# Supplementary material for: Fusion of Multi-Task Neurophysiological Data to Enhance the Detection of Attention- Deficit/Hyperactivity Disorder
Source: PubMed Central journal article supplement — IEEE J Transl Eng Health Med. 2024 Jul 29;12:668–74. doi: 10.1109/JTEHM.2024.3435553 (PMC11505865; doi:10.1109/jtehm.2024.3435553), 2024-07-29
Supplement: supp1-3435553.pdf [file supp1-3435553.pdf]

Supplementary Table I

| <b>Distractions</b>           |                      | <b>Duration (s)</b> |
|-------------------------------|----------------------|---------------------|
| Description                   | Type                 |                     |
| <b>Broadcasting</b>           | <b>A (30 dB)</b>     | <b>31</b>           |
| <b>Footfall</b>               | <b>A (20 dB)</b>     | <b>16</b>           |
| <b>Honking horns</b>          | <b>A (30 dB)</b>     | <b>13</b>           |
| <b>Classmate turning back</b> | <b>V</b>             | <b>32</b>           |
| <b>Raining</b>                | <b>V + A (30 dB)</b> | <b>33</b>           |
| <b>Door opening</b>           | <b>V + A (20 dB)</b> | <b>12</b>           |
| <b>Paper plane flying</b>     | <b>V</b>             | <b>16</b>           |
| <b>TV on</b>                  | <b>V + A (30 dB)</b> | <b>32</b>           |
| <b>Earthquake</b>             | <b>V + A (30 dB)</b> | <b>14</b>           |
| <b>Fire truck passing by</b>  | <b>V + A (30 dB)</b> | <b>50</b>           |
